# Supplementary material for: Influence of Exposure Period and Angle Alteration on the Flexural Resilience and Mechanical Attributes of Photosensitive Resin
Source: MDPI journal article supplement (doi:10.3390/nano12152566), 2022-07-26
Supplement: s1 [file s1]

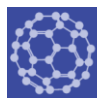

## Supporting Information

## Article

# Influence of Exposure Period and Angle Alteration on the Flexural Resilience and Mechanical Attributes of Photosensitive Resin

Sadaf Bashir Khan <sup>1,2,3,4</sup>, Nan Li <sup>1,4</sup>, Jiahua Liang <sup>4</sup>, Chuang Xiao <sup>1,4</sup>, Xiaohong Sun <sup>3,\*</sup> and Shenggui Chen <sup>1,2,4,\*</sup>

<sup>1</sup> Dongguan University of Technology, Dongguan 523808, China; sadafbashirkhan@dgut.edu.cn (S.B.K.); dglgln@163.com (N.L.); xiaoxcuang@163.com (C.X.)

<sup>2</sup> School of Art and Design, Guangzhou Panyu Polytechnic, Guangzhou 511483, China

<sup>3</sup> School of Materials Science and Engineering, Tianjin University, Tianjin 300350, China

<sup>4</sup> Dongguan Institute of Science and Technology Innovation, Dongguan University of Technology, Dongguan 523808, China; jiahua\_liang1114@163.com (J.L.)

\* Correspondence: sunxh@tju.edu.cn (X.S.); dgutchengsg@163.com (S.C.)

## Supporting Information

- 3D-printed PSR strain ( $\epsilon_{FB}$  &  $\epsilon_{FM}$ ) Analysis
- Figure S1

### 3D Printed PSR Strain ( $\epsilon_{FB}$ & $\epsilon_{FM}$ ) Analysis

Figure S1 represents the flexural strain  $\epsilon_{FB}$  displaying the strain specimens underwent before breaking and flexural strain  $\epsilon_{FM}$ : the specimens' behavior at maximum flexural stress  $\epsilon_{FM}$  at various oblique angles. At E = 10s and fabrication angles 0°, 15°, and 75°, the specimens experienced maximum flexural strain before permanent deformation and  $\epsilon_{FM} = \epsilon_{FB}$ . The minimum flexural strain was observed at OA 70°. Specimens underwent almost similar  $\epsilon_{FM} = \epsilon_{FB}$  at all the OA, as clearly identified in the flexural strain graphs displayed in Figure S1. At E = 20s, the rings fabricated at mid-OA (40°, 50°, 55°, 60°, 65°), HA (75°), and LA (25°) specimens underwent brittle failure before permanent deformation, having  $\epsilon_{FM} = \epsilon_{FB}$  with the lowest strain of 3.6% at angles 25° and 60°. At all other OA, the rings underwent viscoelastic deformation with varying  $\epsilon_{FM}$  and  $\epsilon_{FB}$  (Figure S1b). At E = 30s and 40 s, the minimum  $\epsilon_{FM} = \epsilon_{FB} > 1.7\sim 1.05\%$  was observed at OA=80°. The rings underwent viscoelastic deformation with varying  $\epsilon_{FM}$  and  $\epsilon_{FB}$  at other angles. Specimens with brittle failures had  $\epsilon_{FM} = \epsilon_{FB}$ . All other specimens showing viscoelastic deformation or viscoplastic failures had varying flexural strain at break (Figure S1 (c and d)). In the case of E = 50 s, again, the rings underwent maximum flexural strain of 8.8% before going to permanent deformation at 55°:  $\epsilon_{FM} = 7.18\%$ .

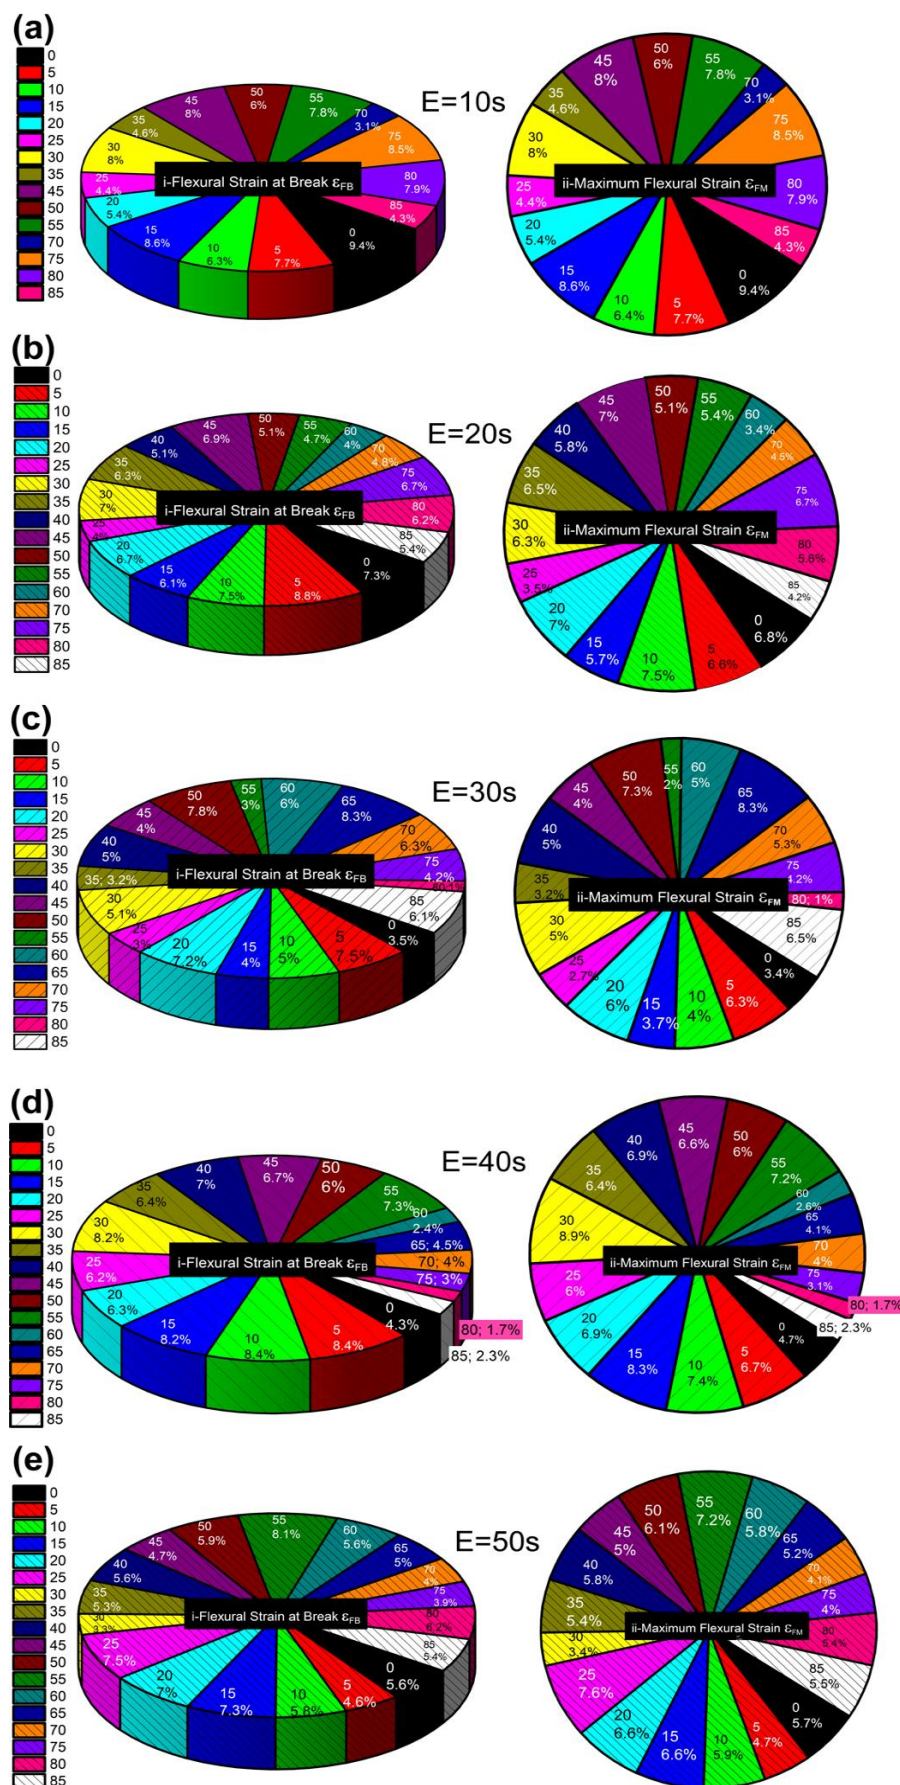

**Figure S1.** Flexural strain at break (i-  $\epsilon_B$ ) and maximum flexural strain (ii-  $\epsilon_M$ ) graphs of fabricated rings at (a) E = 10 s, (b) E = 20 s, (c) E = 30 s, (d) E = 40 s, and (e) E = 50s at different OA.
